# Supplementary material for: Visible-Light Driven Photocatalytic Degradation of 4-Chlorophenol Using Graphitic Carbon Nitride-Based Nanocomposites
Source: MDPI journal article supplement (doi:10.3390/catal12030281), 2022-03-02
Supplement: s1 [file s1]

## Supplementary Material

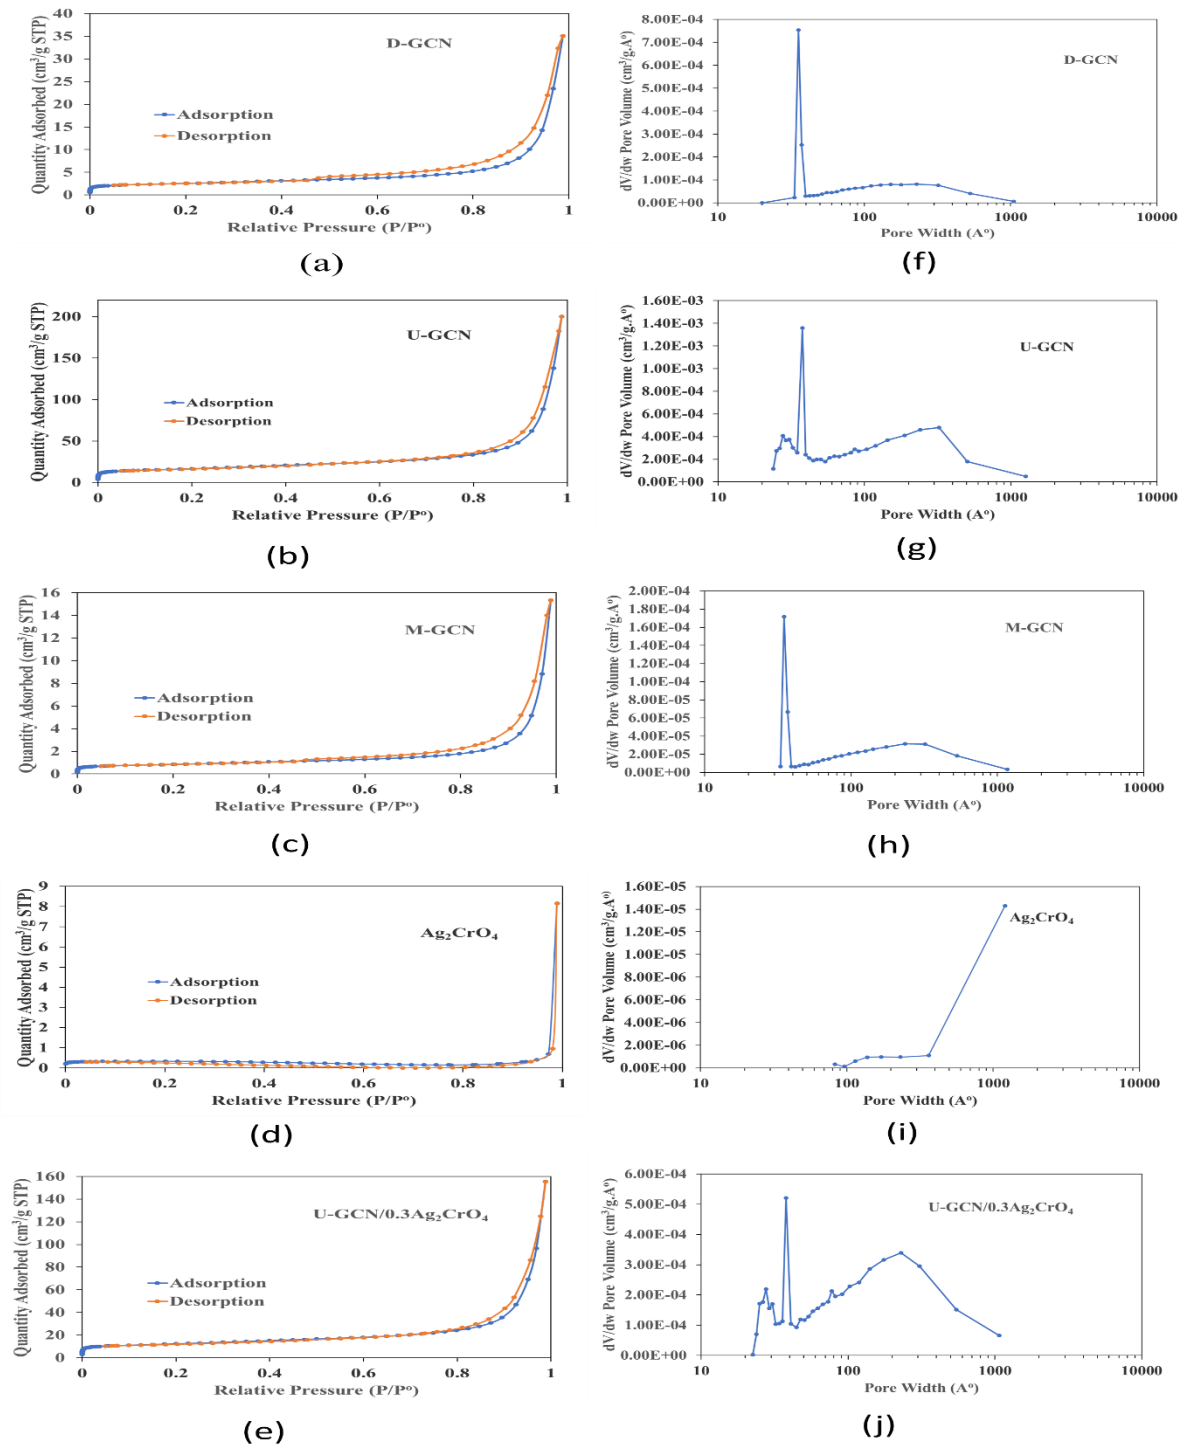

Figure S1.  $N_2$  adsorption-desorption isotherms and their corresponding pore size distribution curves for the photocatalysts: D-GCN, U-GCN, M-GCN,  $Ag_2CrO_4$ , and U-GCN/ $0.3Ag_2CrO_4$

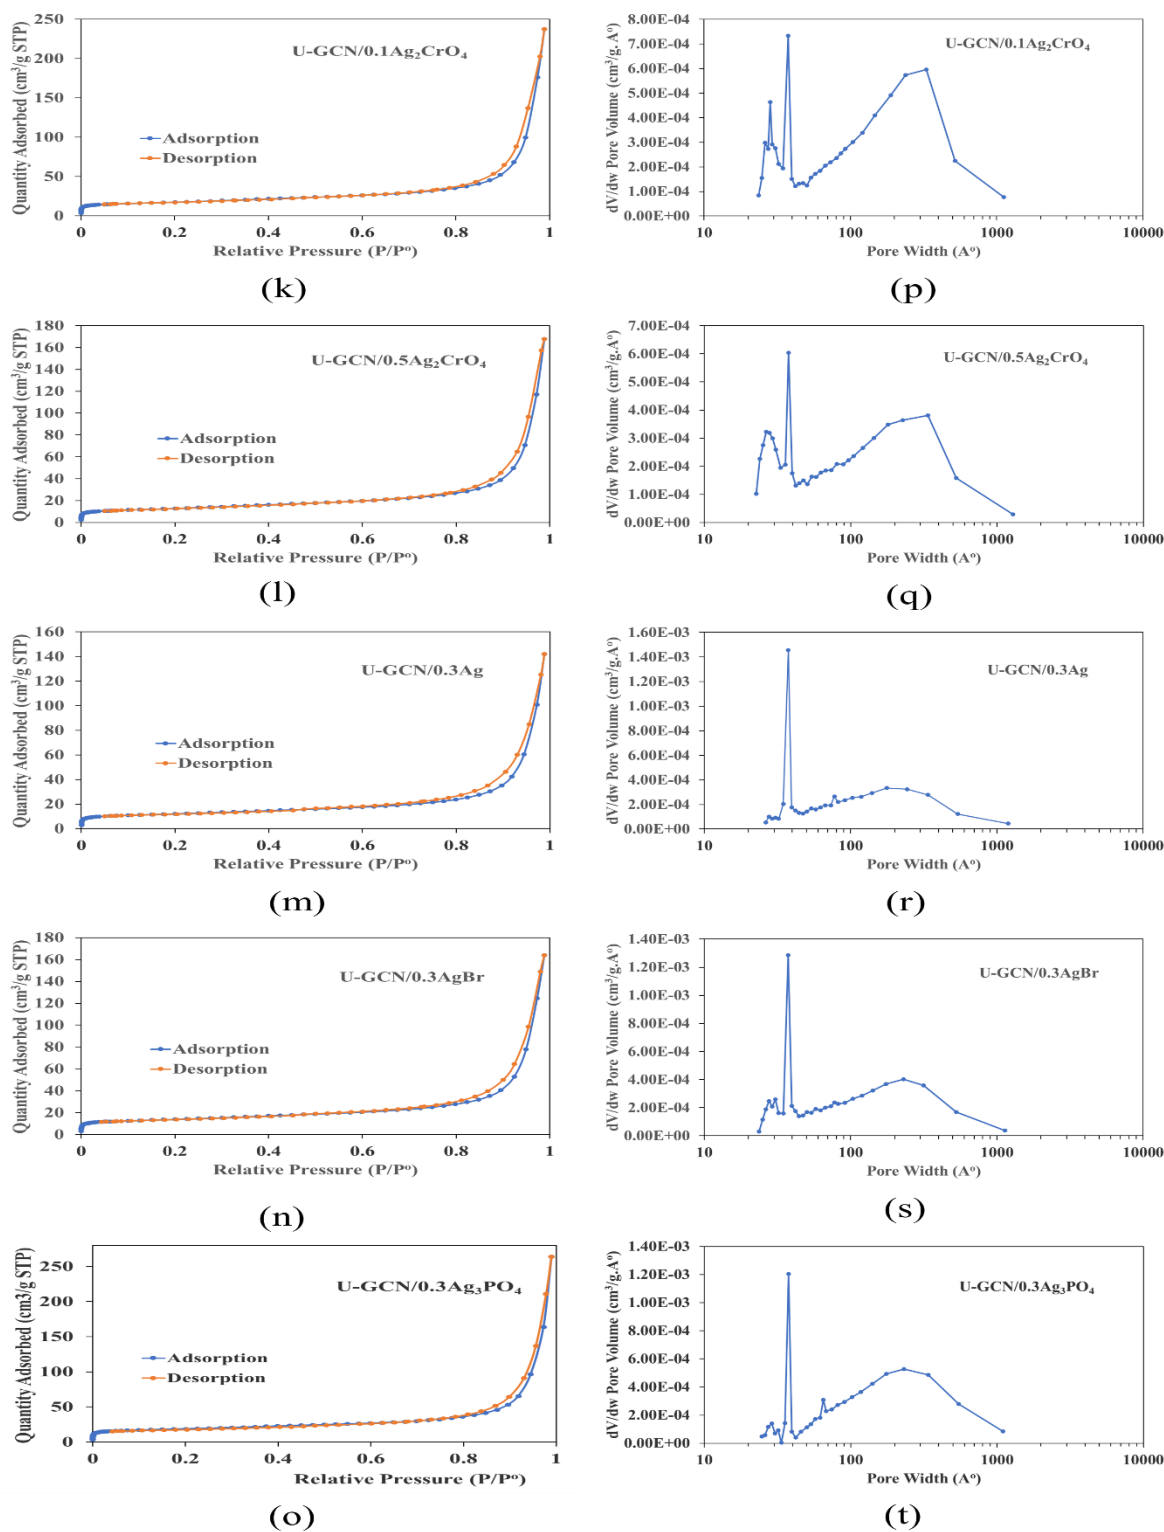

Figure S2. N<sub>2</sub> adsorption-desorption isotherms and their corresponding pore size distribution curves for the photocatalysts: U-GCN/0.1Ag<sub>2</sub>CrO<sub>4</sub>, U-GCN/0.5Ag<sub>2</sub>CrO<sub>4</sub>, U-GCN/0.3Ag, U-GCN/0.3AgBr, and U-GCN/0.3Ag<sub>3</sub>PO<sub>4</sub>

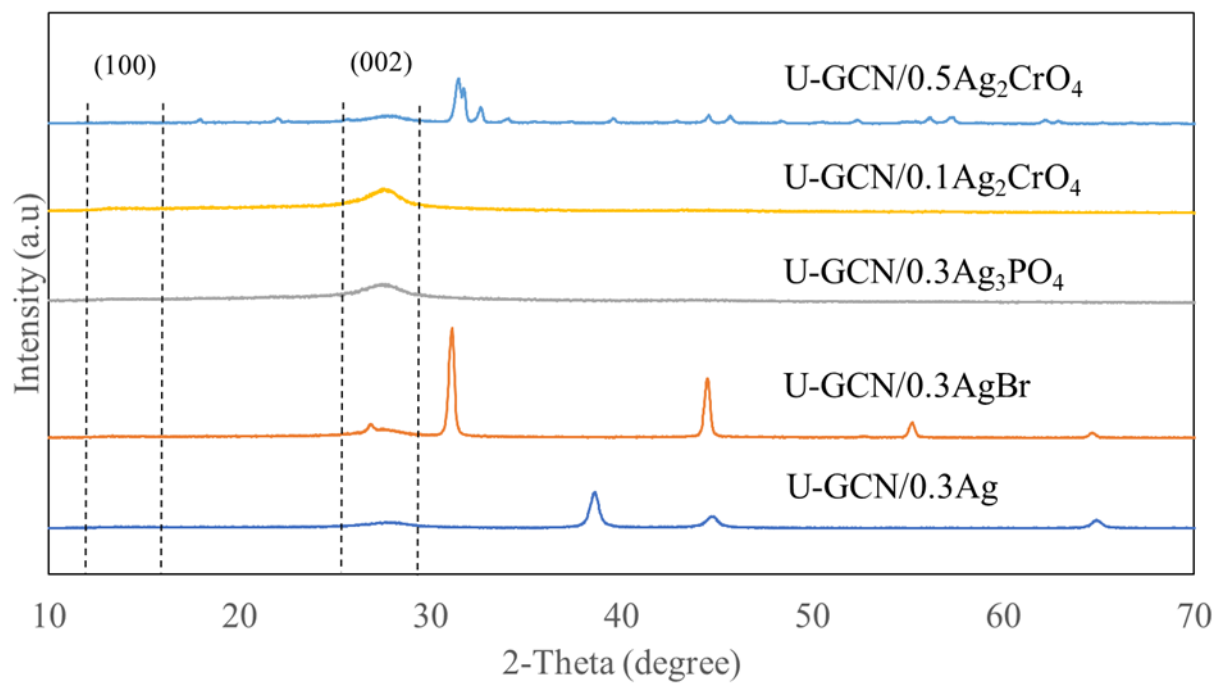

Figure S3. XRD patterns for the photocatalysts: U-GCN/silver-based composites and U-GCN/silver chromate composites

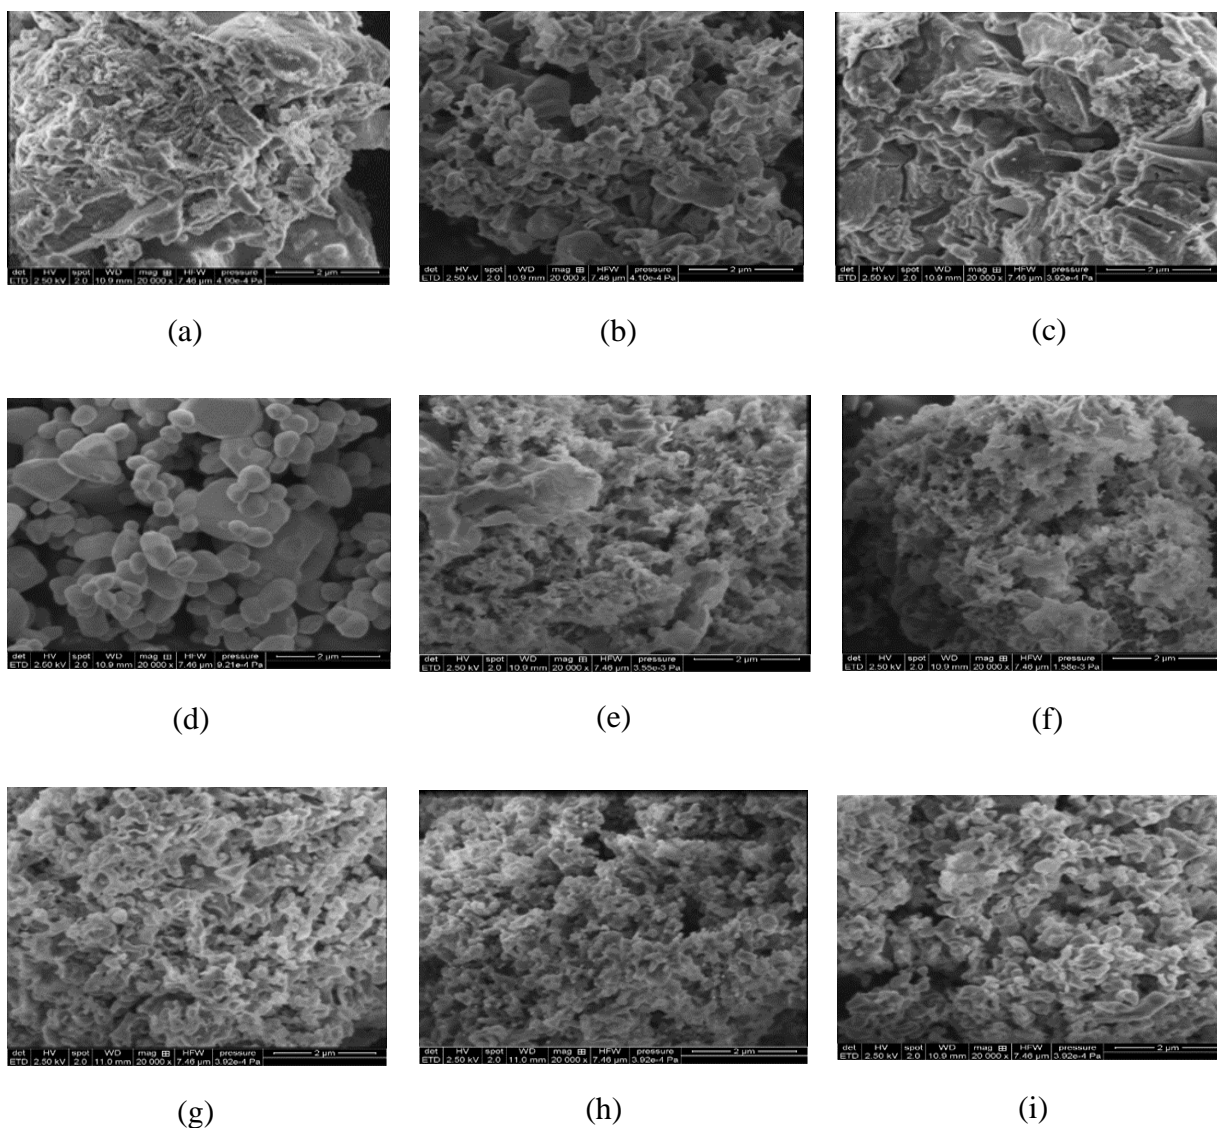

Figure S4. SEM images for the photocatalysts: (a) D-GCN, (b) U-GCN, (c) M-GCN, (d)  $\text{Ag}_2\text{CrO}_4$ , (e) U-GCN/0.1 $\text{Ag}_2\text{CrO}_4$ , (f) U-GCN/0.5 $\text{Ag}_2\text{CrO}_4$ , (g) U-GCN/0.3Ag, (h) U-GCN/0.3AgBr, and (i) U-GCN/0.3 $\text{Ag}_3\text{PO}_4$

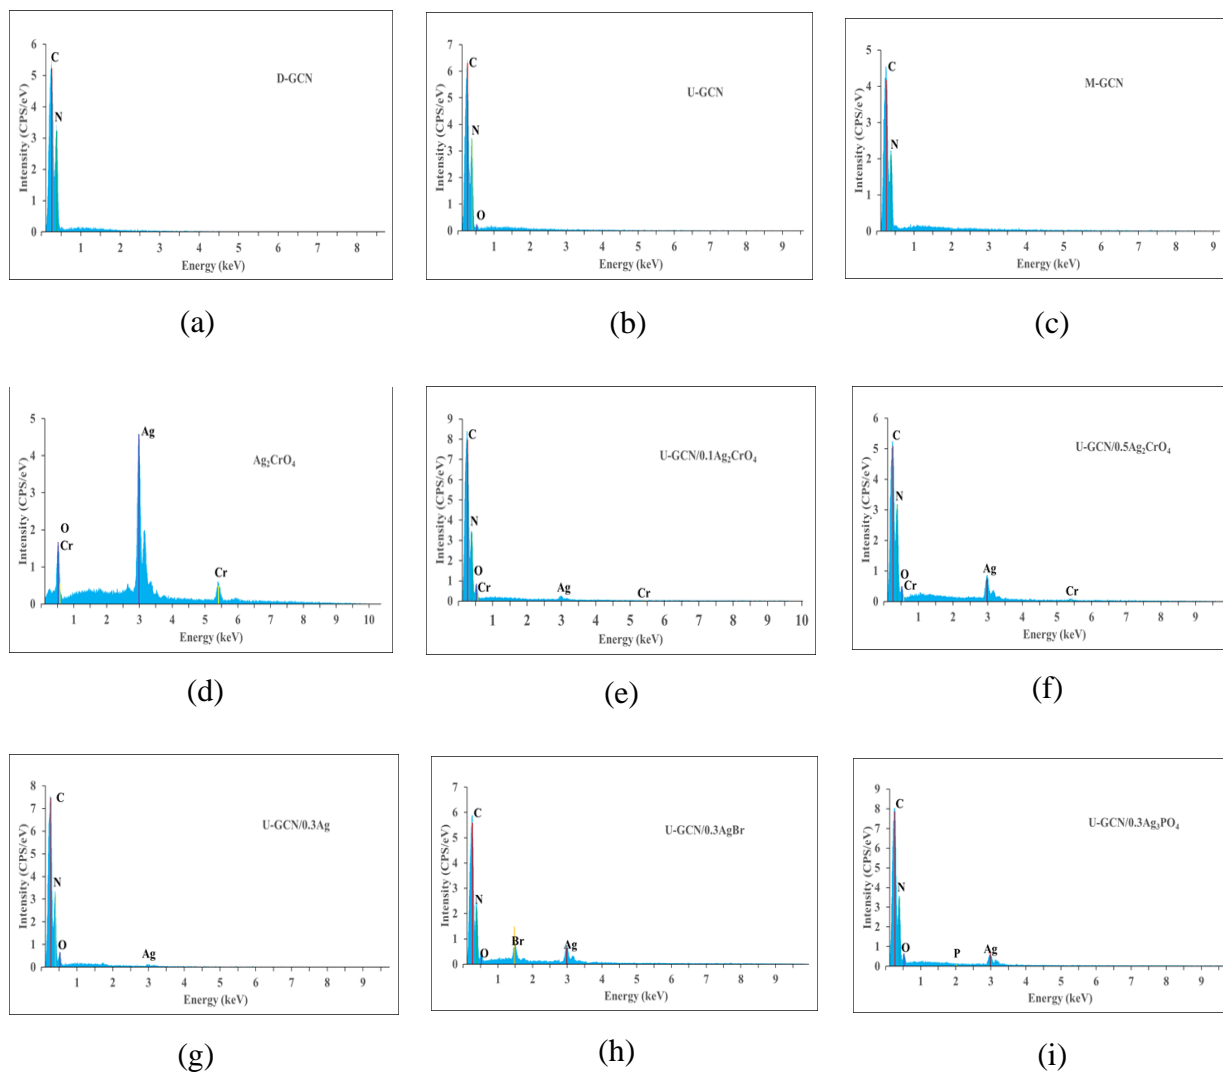

Figure S5. EDS images for the photocatalysts: (a) D-GCN, (b) U-GCN, (c) M-GCN, (d)  $\text{Ag}_2\text{CrO}_4$ , (e) U-GCN/ $0.1\text{Ag}_2\text{CrO}_4$ , (f) U-GCN/ $0.5\text{Ag}_2\text{CrO}_4$ , (g) U-GCN/ $0.3\text{Ag}$ , (h) U-GCN/ $0.3\text{AgBr}$ , and (i) U-GCN/ $0.3\text{Ag}_3\text{PO}_4$

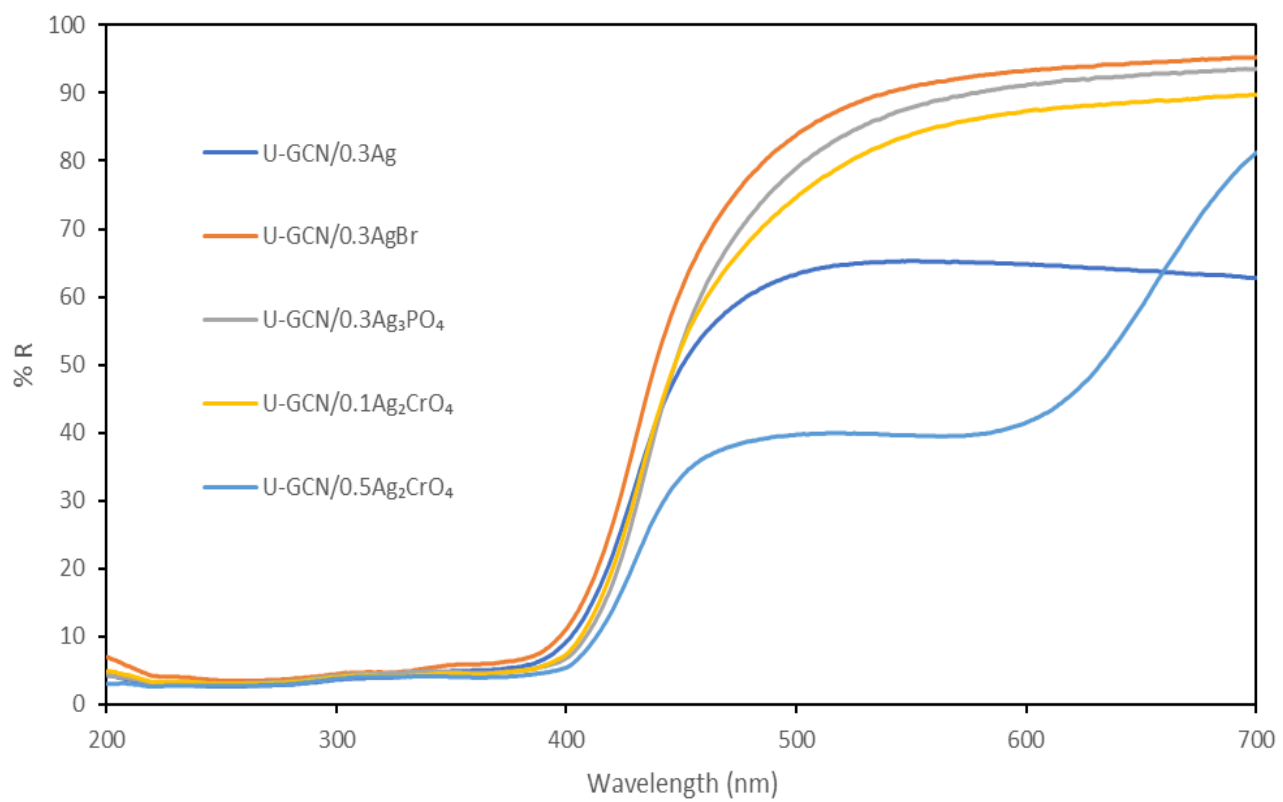

Figure S6. UV-Vis DRS for the photocatalysts: U-GCN/silver-based composites and U-GCN/silver chromate composites

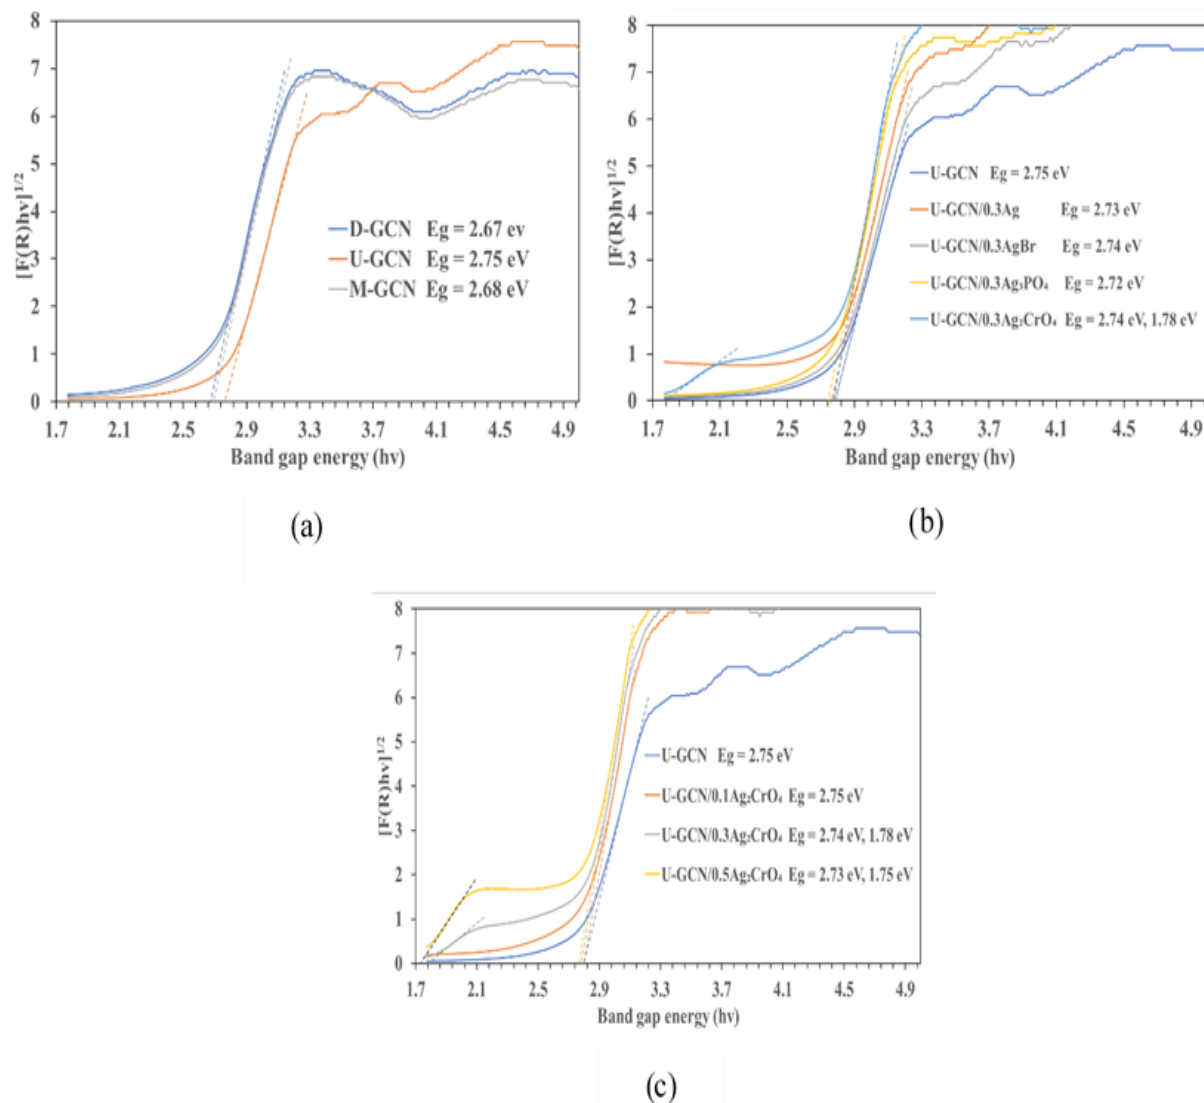

Figure S7. Bandgap energies of the photocatalysts: (a) GCNs derived from different precursors of dicyandiamide (D), urea (U), and melamine (M), (b) U-GCN/silver-based compounds, all in the same ratio of 1:0.3 and (c) U-GCN/ $x$ Ag<sub>2</sub>CrO<sub>4</sub> where  $x = 0.1, 0.3$  and  $0.5$ .

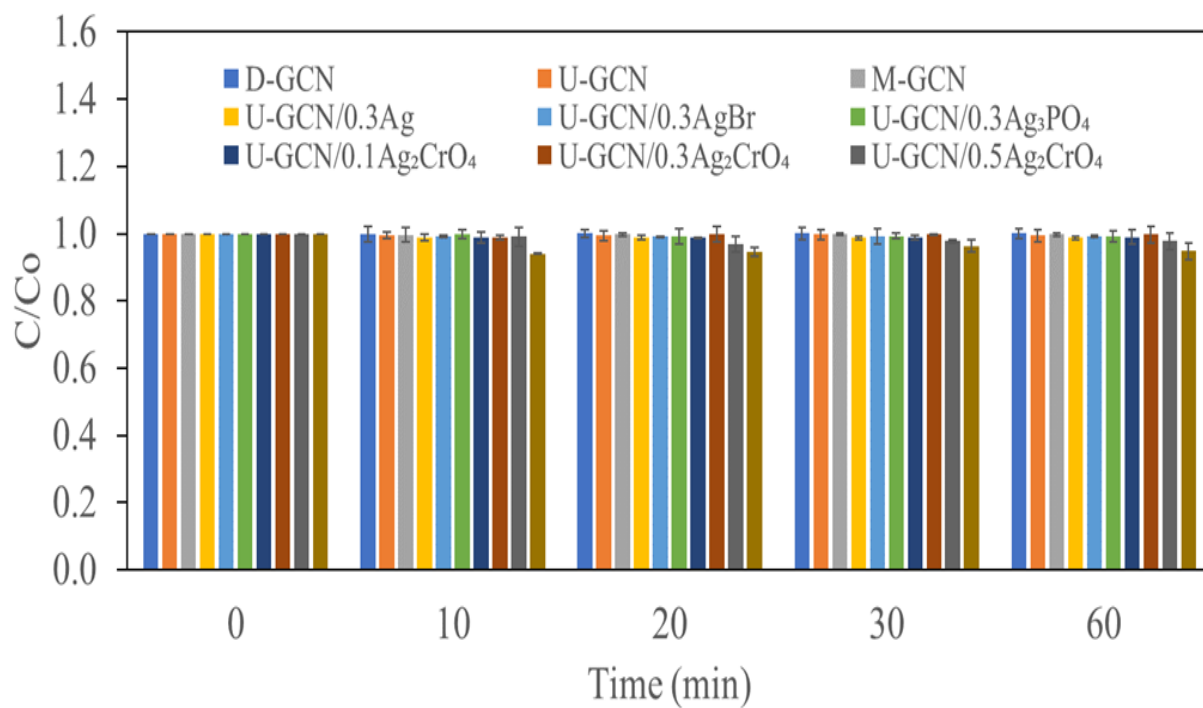

Figure S8. Adsorption performance of the synthesized photocatalysts on 4-CP in dark condition



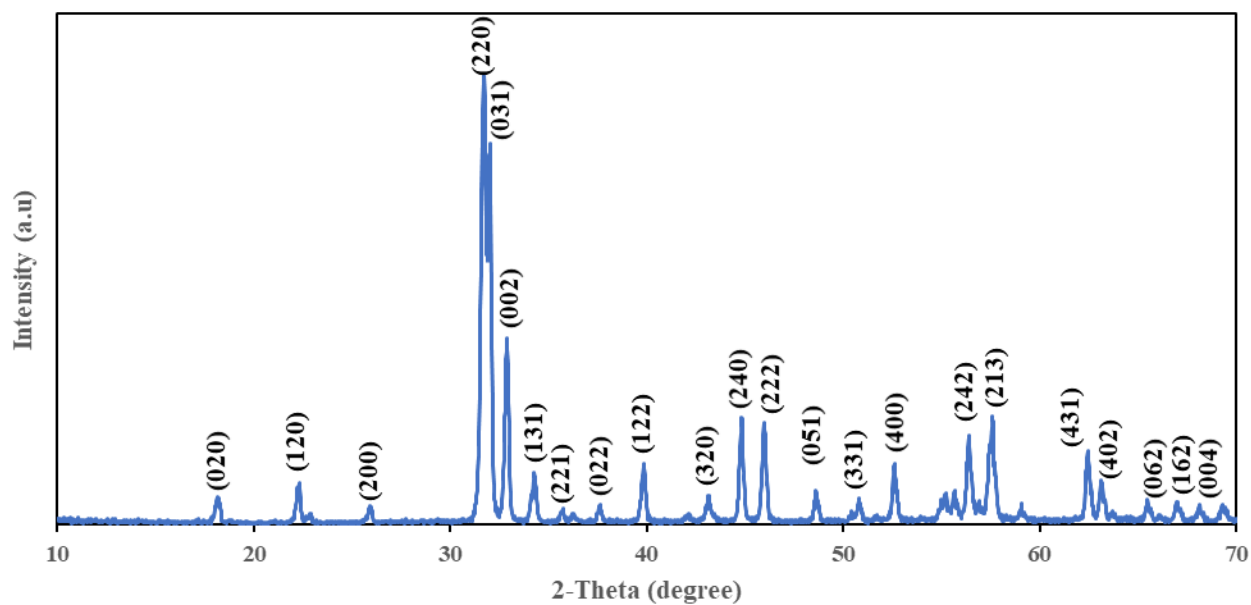

Figure S9. XRD pattern for  $\text{Ag}_2\text{CrO}_4$

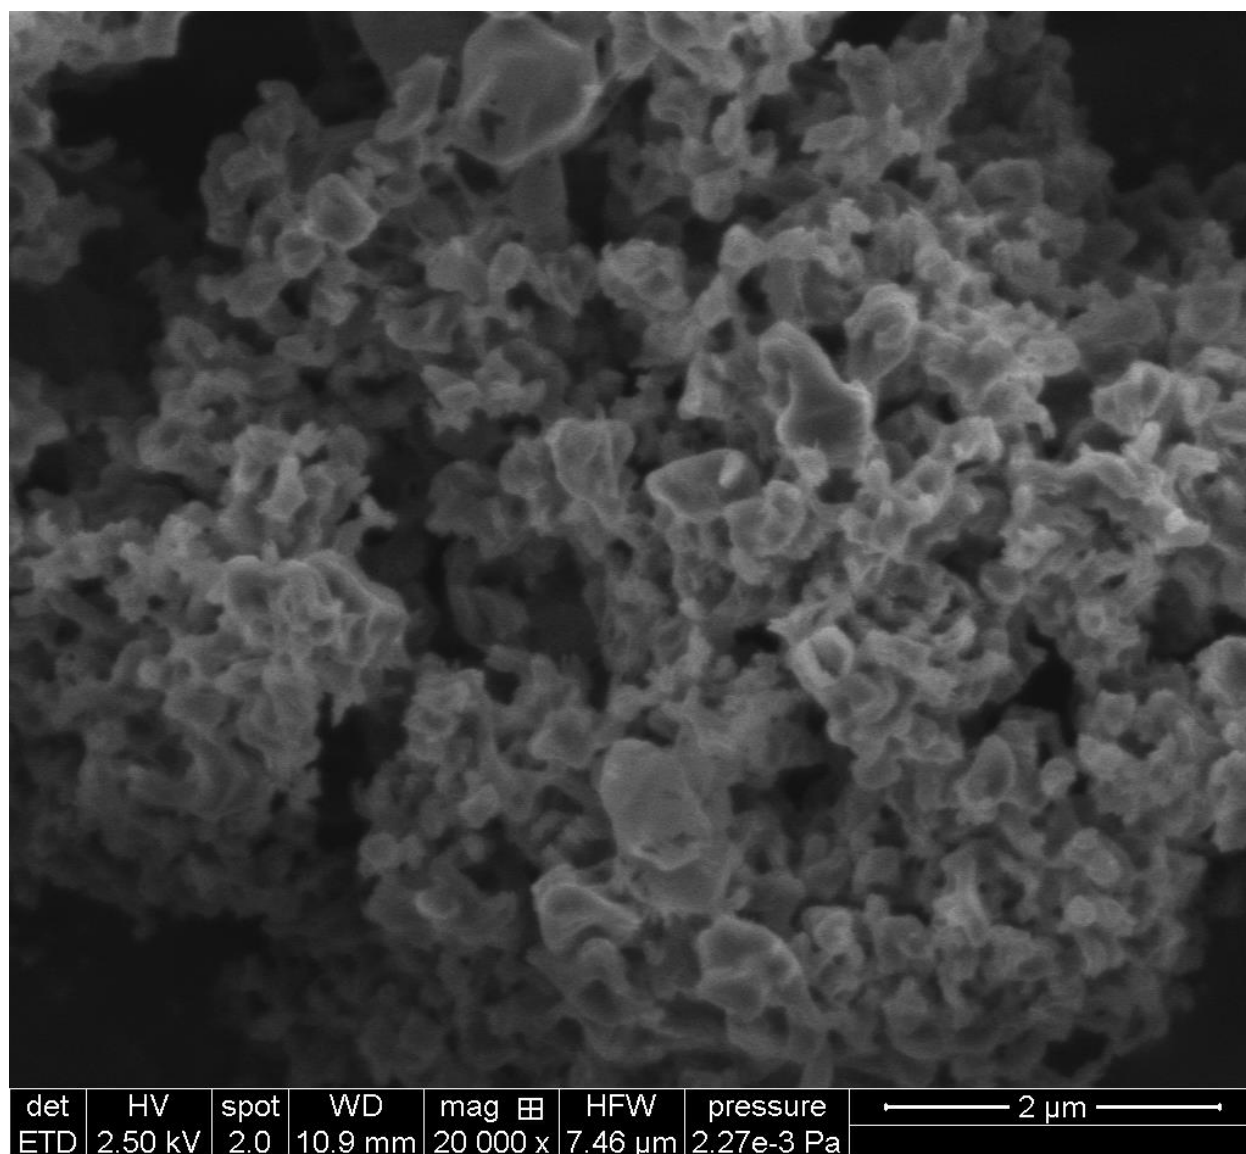

Figure S10. High-resolution SEM image of U-GCN/Ag<sub>2</sub>CrO<sub>4</sub>
