# Supplementary material for: Visible-Light Driven Photocatalytic Degradation of 4-Chlorophenol Using Graphitic Carbon Nitride-Based Nanocomposites
Source: MDPI journal article supplement (doi:10.3390/catal12030281), 2022-03-02
Supplement: s1 [file s1]

Archive with 1 entries (1 files):
- catalysts-1582487-supplementary.pdf
